# Supplementary material
Source: publisher site journal article supplement (https://www.dovepress.com/article/336094)
Supplement: Supplementary file 1 [file get_supplementary_file.php]

**Table S1** The information of donors.

|  | AD+(n=25) | AD-(n=25) | P-value |
| --- | --- | --- | --- |
| Age (years old) | 51.32±12.52 | 50.48±5.74 | 0.762a |
| Body mass index | 28.48±3.14 | 26.36±3.98 | 0.042 a |
| Female | 12(48.00) | 10(40.00) | 0.285b |
| Current smoker | 2(8.00) | 5(20.00) | 0.209b |
| Alcoholic abuse | 1(4.00) | 0(0.00) | 0.500b |
| Hypertension | 15(60.00) | 13(52.00) | 0.338b |
| Hyperlipidemia | 4(16.00) | 5(20.00) | 0.500b |
| Atherosclerosis | 0(0.00) | 0(0.00) | # |
| Diabetes mellitus | 2(8.00) | 1(4.00) | 0.500b |
| Previous aortic dissection | 2(8.00) | 0(0.00) | 0.245b |

AD：Aortic dissection.

Statistical comparison was performed by using Student’s t-test (a) or two-sided λ2 test (b).

**Table S2 s**iRNA sequences used in this study.

| **siRNAs** |  |
| --- | --- |
| hsa_circ_TGFBR2-1 | GGGAGTTAATAACGACATGAT |
| hsa_circ_TGFBR2-2 | GTAATGCAGTGGGAGTTAATA |
| hsa_circ_TGFBR2-3 | AGTGGGAGTTAATAACGACAT |
| si-NC | UUCUCCGAACGUGUCACGUTT |

**Table S3** miRNA mimics sequences used in this study.

| **mimics** |  |
| --- | --- |
| miR-29a mimics sense | 5’-UAGCACCAUCUGAAAUCGGUUA-3’ |
| miR-29a mimics antisense | 5’-AGUGGUAGACUUUAGCCAAUUU-3’ |
| mimics control sense | 5’-UUCUCCGAACGUGUCACGUTT-3’ |
| mimics control antisense | 5’-ACGUGACACGUUCGGAGAATT-3’ |

**Table S4** Primers used for real-time PCR in this study.

| **Primer sequence** |  |  |
| --- | --- | --- |
| circ_TGFBR2 | Forward | 5ʹ-TGAGTCCTTCAAGCAGACCG-3ʹ |
| Reverse | 5ʹ-GATGGAGGTGATGCTGCAGT-3ʹ |
| miR-29a | Forward | 5ʹ-TAGCACCATCTGAAATC-3ʹ |
| Reverse | 5ʹ-CAGTGCGTGTCGTGGAGT-3ʹ |
| KLF4 | Forward | 5ʹ-TTAATGAGGCAGCCACCTGG-3ʹ |
| Reverse | 5ʹ-ACTCCCTGCCATAGAGGAGG-3ʹ |
| GAPDH | Forward | 5ʹ-GATTTGGTCGTATTGGGCGC-3ʹ |
| Reverse | 5ʹ-AGTGATGGCATGGACTGTGG-3ʹ |
| U6 | Reverse | 5ʹ- AAGATTAGCATGGCCCCTGC-3ʹ |
| Forward | 5ʹ- CCATTTCTCGATTTGTGCGTGT-3ʹ |

**Table S5** FISH probes sequences used in this study.

| **FISH probes** |  |
| --- | --- |
| circ_TGFBR2 | FITC-TGTCGTTATTAACTCCCACTGCAC |
| miR-29a | Cy3-GAACGTACTCAACTCTGTCGACC |


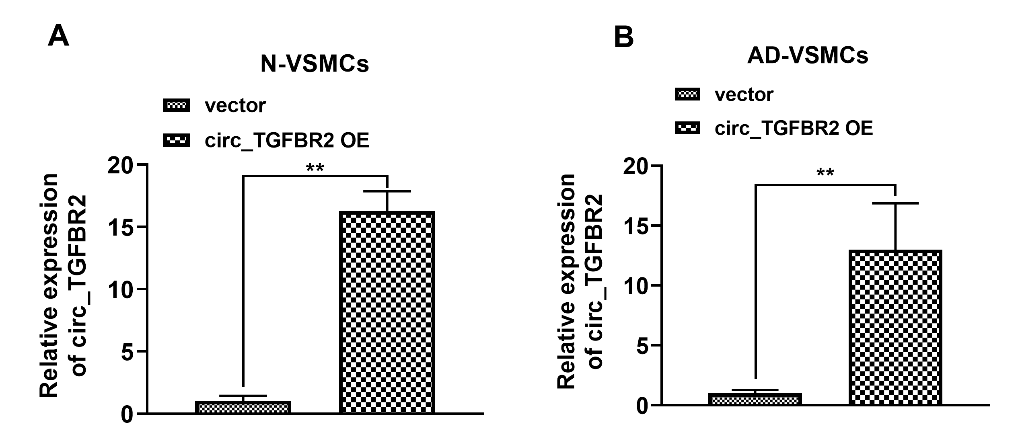


Figure S1. The overexpression efficiency of circ_TGFBR2 OE was determined through qRT-PCT after transfection in N-VSMCs cells and AD-VSMCs cells (n=3). Data are presented as mean ± SD. ***p*<0.01 in 2-tailed t-test (A, B). N-VSMCs indicates normal aorta vascular smooth muscle cells; AD-VSMCs, aortic dissection vascular smooth muscle cells; circ_TGFBR2 OE, circ_TGFBR2 overexpression plasmids.


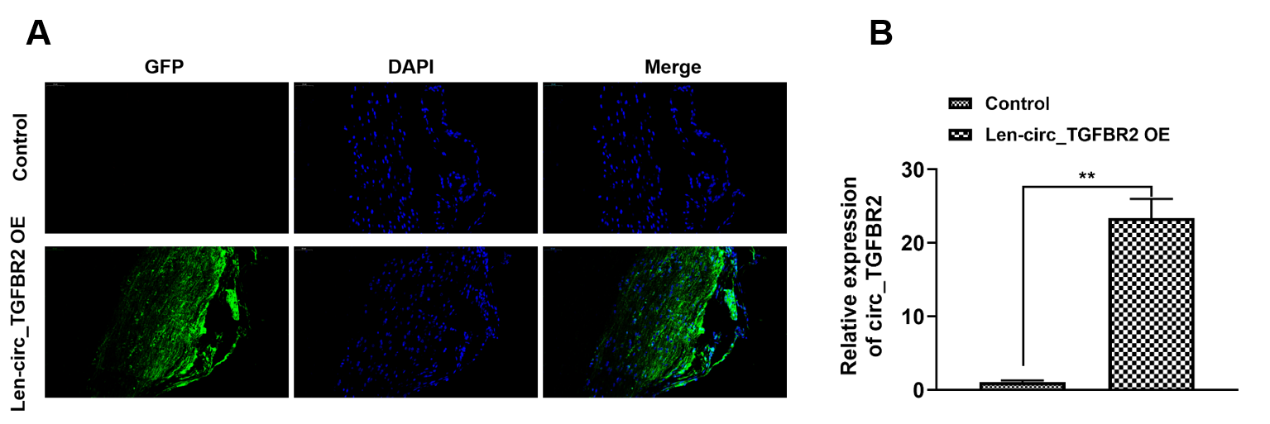


Figure S2. The delivery efficiency of Len-circ_TGFBR2 OE was validated by GFP fluorescence (A) (Scale bar=50 µm) and qRT-PCR(B) in aorta samples of AD model rat (n=3). Data are presented as mean ± SD. ***p*<0.01 in 2-tailed t-test (B). GFP indicates green fluorescent protein; Len-circ_TGFBR2 OE, lentivirus carrying circ_TGFBR2 overexpression plasmids.


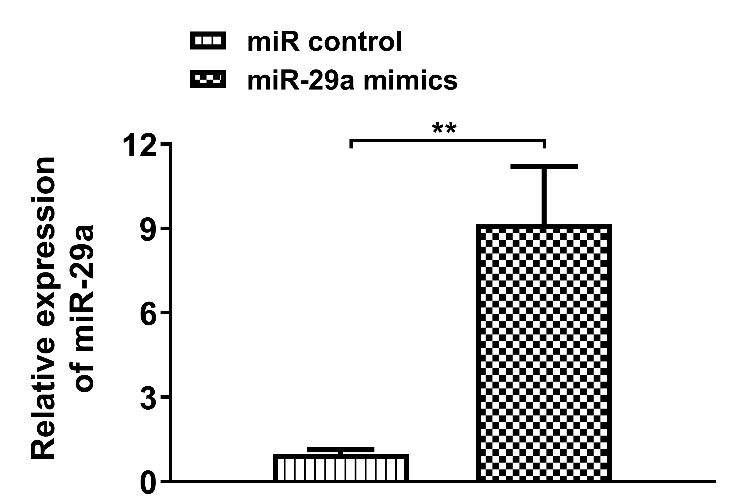


Figure S3. The expression of miR-29a was detected through qRT-PCR analysis after transfection of miR control or miR-29a mimics into AD-VSMCs cells. Data are presented as mean ± SD. **p<0.01 in 2-tailed t-test.


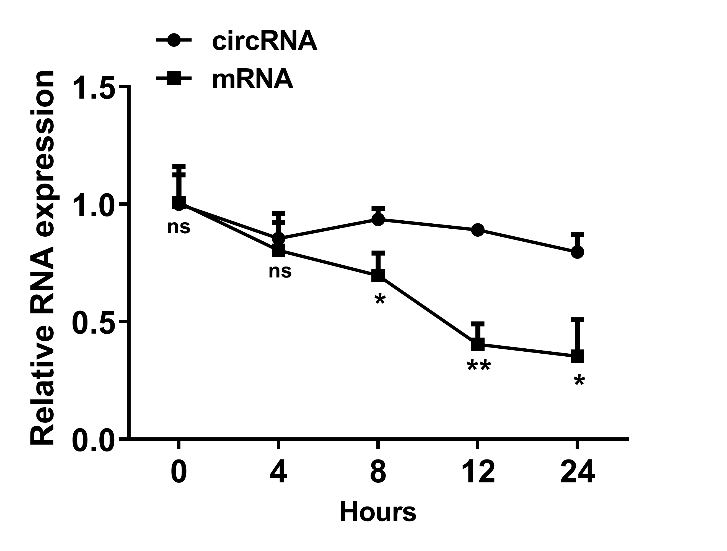


Figure S4. qRT-PCR was performed to confirm TGFBR2 mRNA and circ_TGFBR2 level in AD-VSMCs cells after treatment with actinomycin D for 0, 4, 8, 12, 24h, respectively (n=3). Data are presented as mean ± SD. **p*<0.05, ***p*<0.01, ns=non-significant.


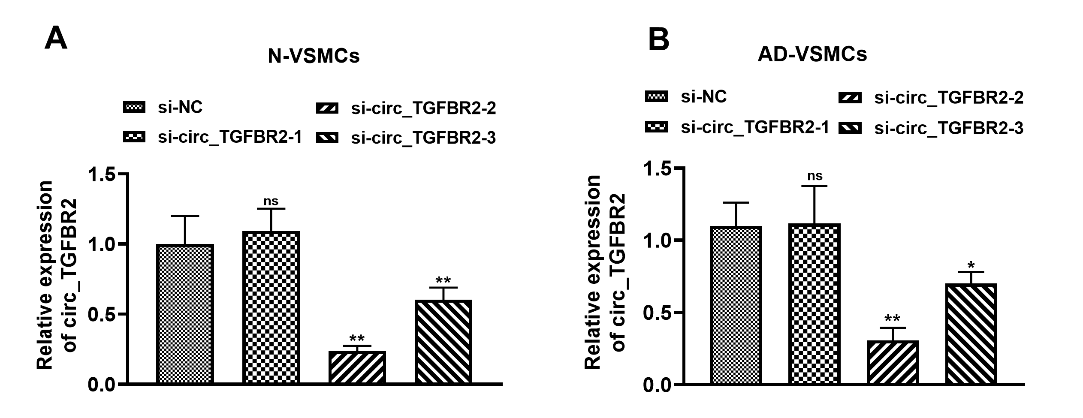


Figure S5. The interference efficiency of si-circ_TGFBR2(si-circ_TGFBR2-1, si-circ_TGFBR2-2, si-circ_TGFBR2-3) was detected via qRT-PCR analysis in N-VSMCs cells and AD-VSMCs cells (n=3). Data are presented as mean ± SD. **p*<0.05, ***p*<0.01, ns=non-significant in Tukey’s post-hoc comparisons test (A, B). N-VSMCs indicates normal aorta vascular smooth muscle cells; AD-VSMCs, aortic dissection vascular smooth muscle cells; si-circ_TGFBR2 indicates small interfering RNA targeting circ_TGFBR2.


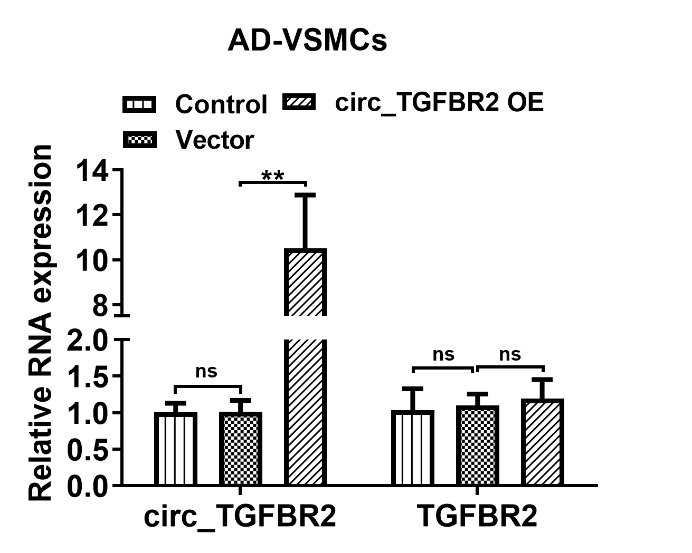


Figure S6. The expression of circ_TGFBR2 and TGFBR2 was determined by qRT-PCR analysis after circ_TGFBR2 OE transfection into AD-VSMCs cells. ***p*<0.01, ns=non-significant in Tukey’s post-hoc comparisons test. circ_TGFBR2 OE, circ_TGFBR2 overexpression plasmids


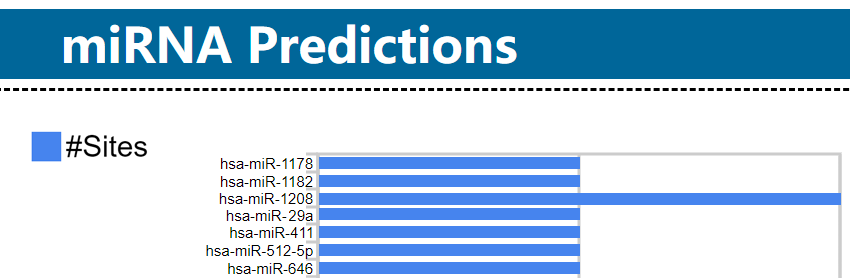


Figure S7. The bioinformatics analysis of miRNAs which could potentially target circ_TGFBR2 through circular RNA interactome database.
